# Supplementary material for: Structure analysis of precursor alloy and diffusion during dealloying of Ag–Al alloy
Source: Royal Society of Chemistry journal article supplement (doi:10.1039/c7ra12915g), 2018-01-01
Supplement: c7ra12915g1.pdf [file c7ra12915g1.pdf]

## Figures

Fig.1 Photograph of the Ag-Al alloy ribbons

Fig.2 SEM micrographs of the (a)  $\text{Ag}_{30}\text{Al}_{70}$ , (c)  $\text{Ag}_{35}\text{Al}_{65}$  and (e)  $\text{Ag}_{40}\text{Al}_{60}$  melt-spun samples (plan view); (b), (d) and (f) EDS results of  $\text{Ag}_{30}\text{Al}_{70}$ ,  $\text{Ag}_{35}\text{Al}_{65}$  and  $\text{Ag}_{40}\text{Al}_{60}$  precursor alloy samples.

Fig.3 XRD patterns of the melt-spun Ag-Al ribbons

Fig.4. XRD patterns of Ag-Al samples under the dealloyed condition for 30 min.

Fig.5 SEM micrographs of the  $\text{Ag}_{30}\text{Al}_{70}$  samples (plan view) under the dealloyed conditions for different periods of time: (a) 5 min, (b) 10 min, (c) 20 min, and (d) 30 min; (e) EDS pattern of  $\text{Ag}_{30}\text{Al}_{70}$  sample dealloyed for 30 min.

Fig.6 SEM micrographs of the  $\text{Ag}_{35}\text{Al}_{65}$  samples (plan view) under the dealloyed conditions for different periods of time: (a) 5 min, (b) 10 min, (c) 20 min, and (d) 30 min; (e) EDS pattern of  $\text{Ag}_{35}\text{Al}_{65}$  sample dealloyed for 30 min.

Fig.7 SEM micrographs of the  $\text{Ag}_{40}\text{Al}_{60}$  samples (plan view) under the dealloyed conditions for different periods of time: (a) 5 min, (b) 10 min, (c) 20 min, and (d) 30 min; (e) EDS pattern of  $\text{Ag}_{40}\text{Al}_{60}$  sample dealloyed for 30 min.

Fig.8 Statistics of ligament size (a) and pore size (b) with the increasing dealloying time in different alloy samples.

Fig.9(a) TEM bright-field image with SAED pattern inset for  $\text{Ag}_{35}\text{Al}_{65}$  ribbons dealloyed for 30 min; (b) Selected areas (marked by rectangles in Fig.9(a) magnified HRTEM bright-field image.

Fig.10 Log-log plot of ligament diameter versus dealloying time for samples.

Fig.11(a-c) HRTEM images of a cross section incised via FIB and corresponding DF-TEM (d) and EDS (e,f) results of the  $\text{Ag}_{35}\text{Al}_{65}$  initial alloy.

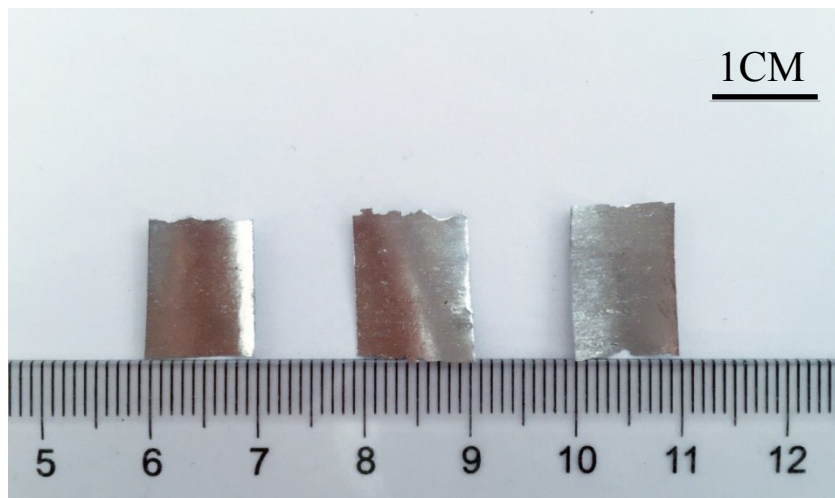

FIG. 1

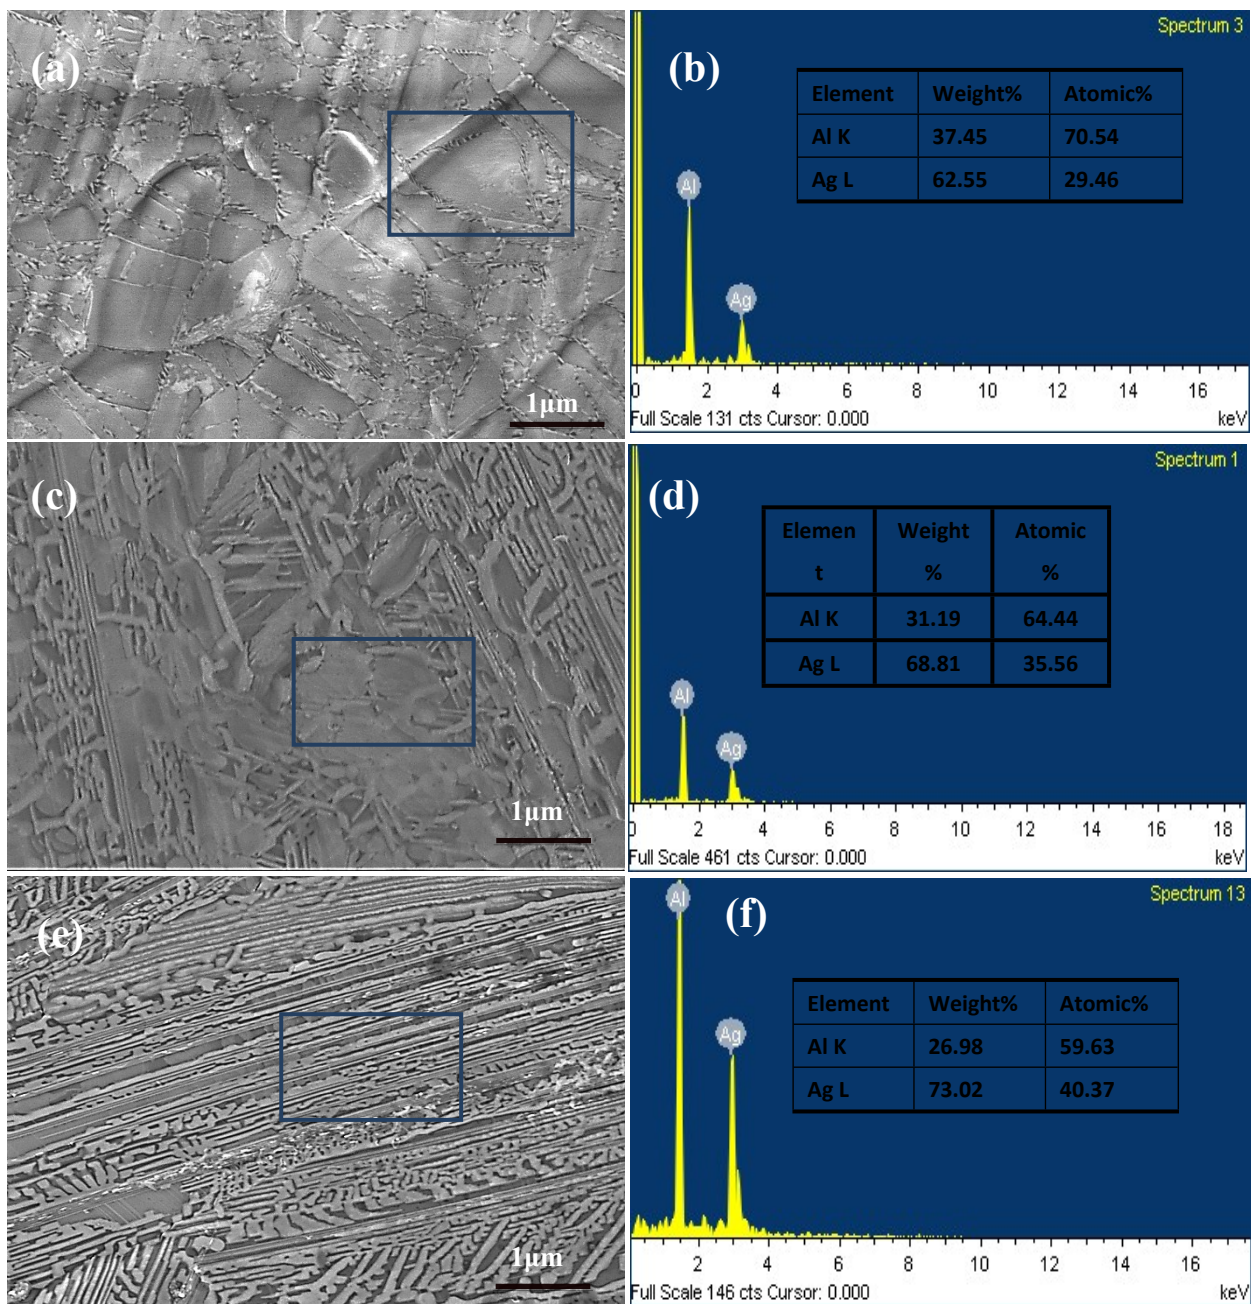

FIG. 2

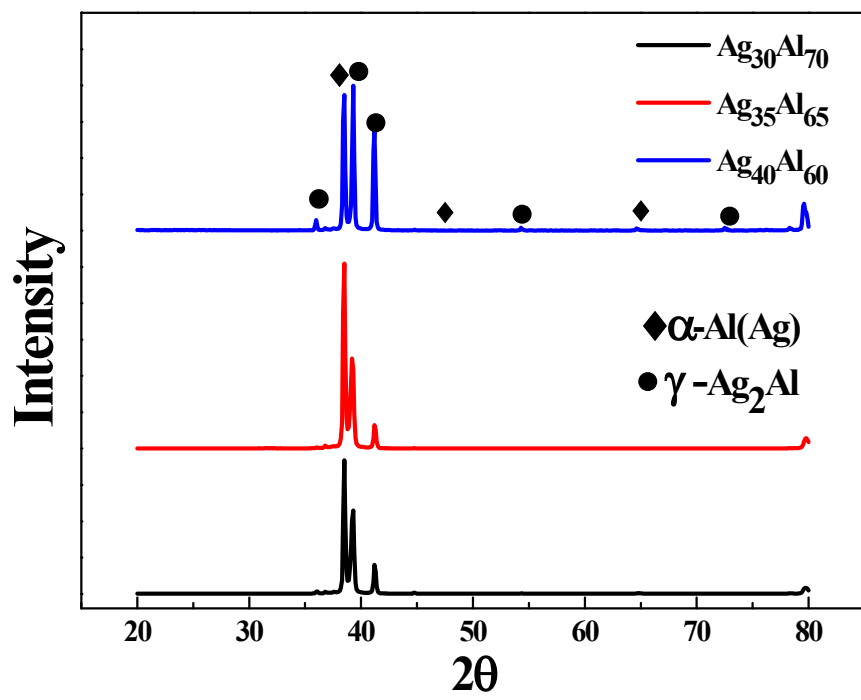

FIG. 3

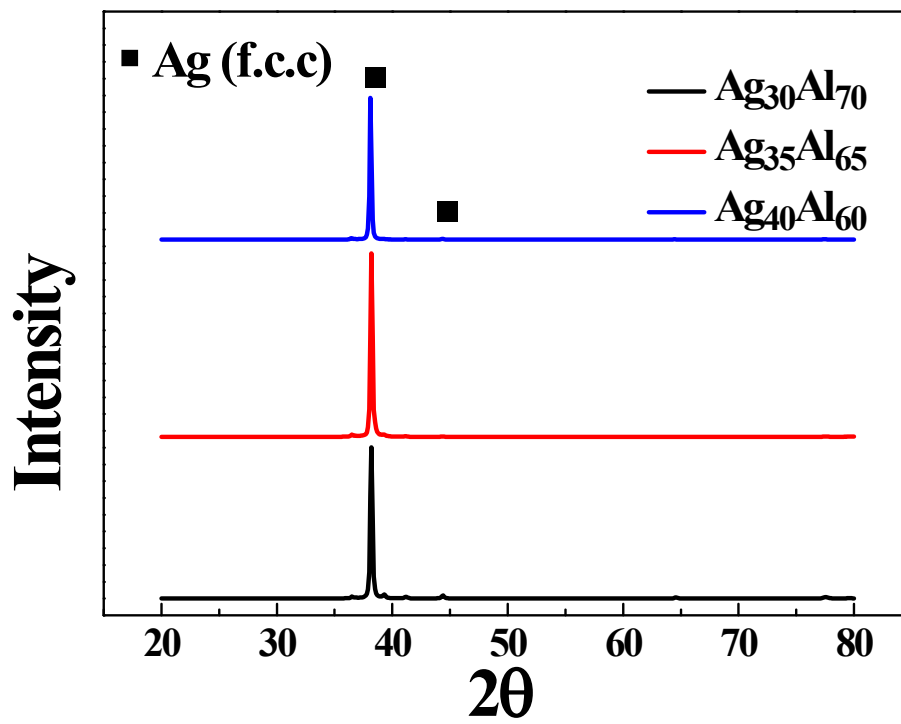

FIG. 4

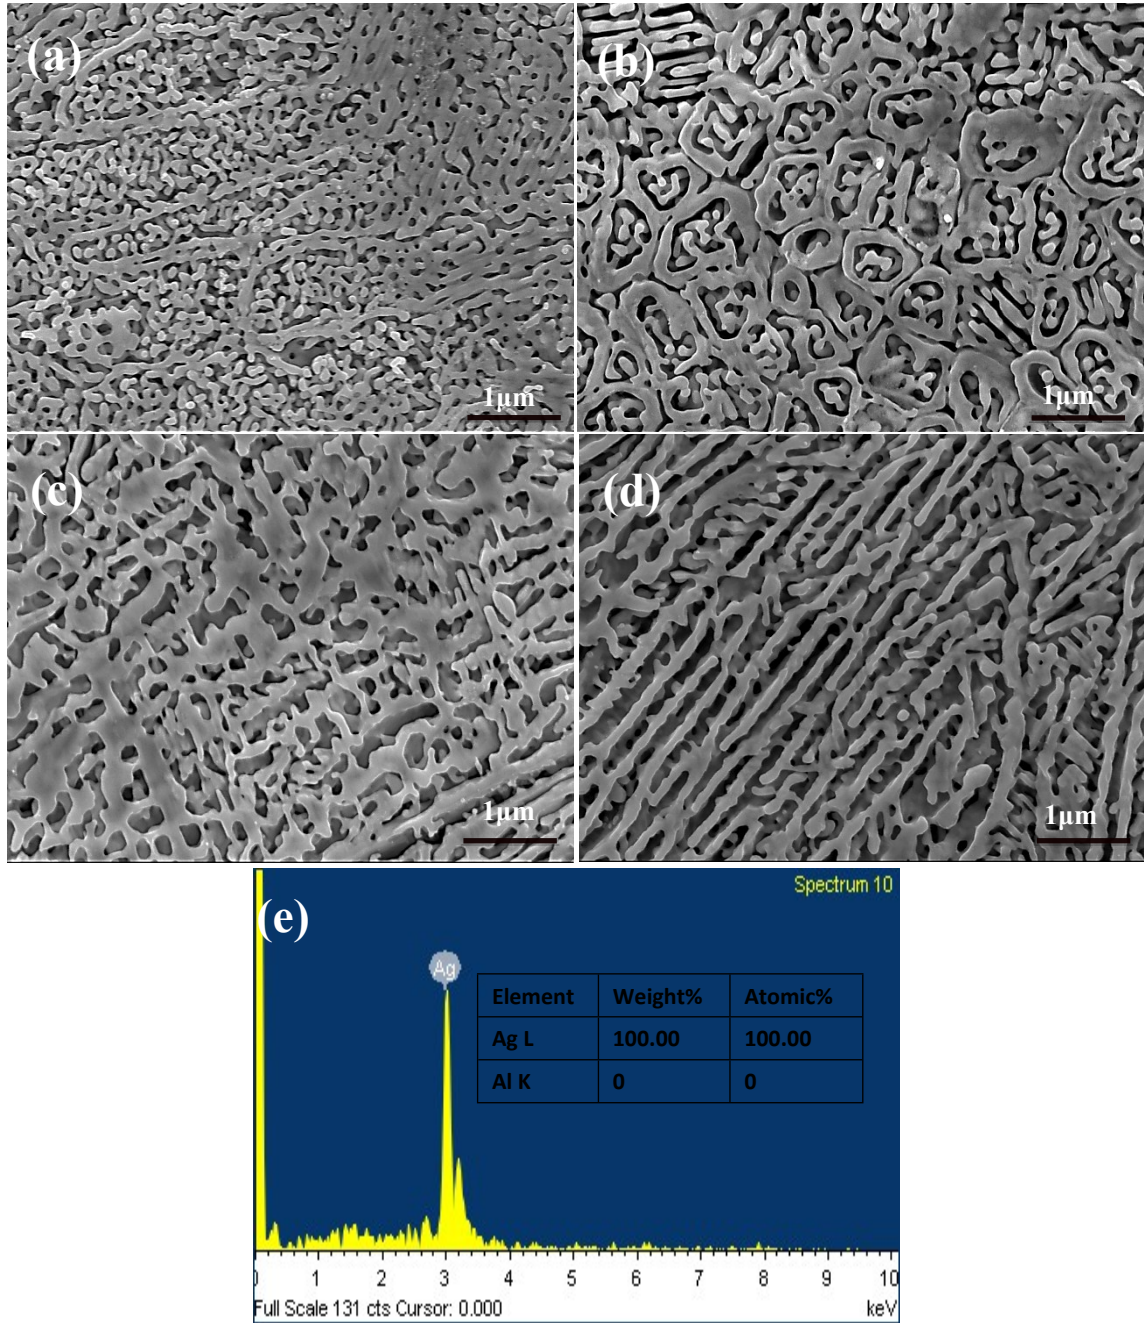

FIG. 5

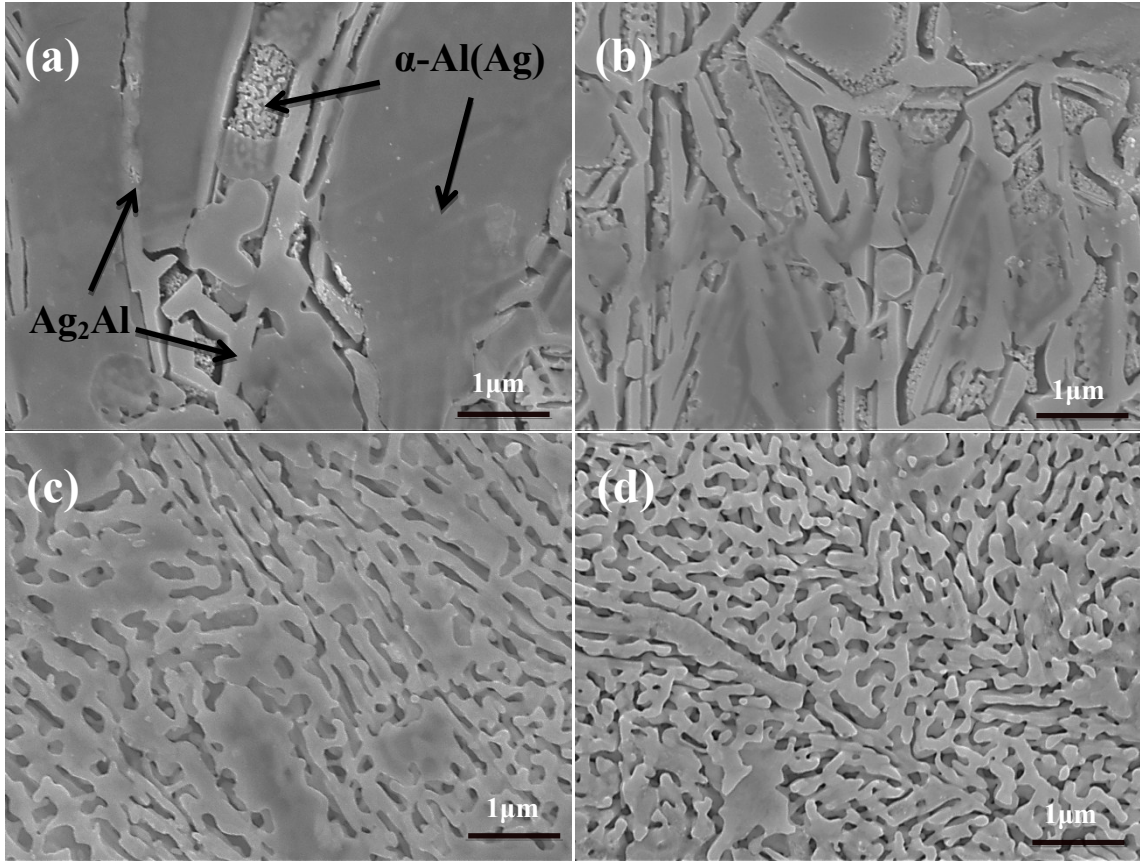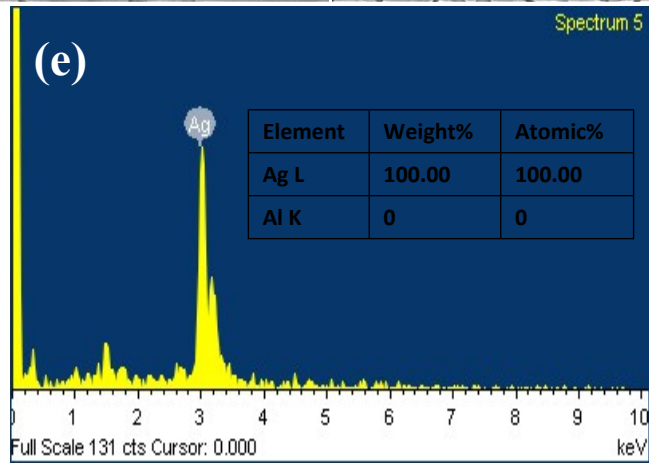

FIG. 6

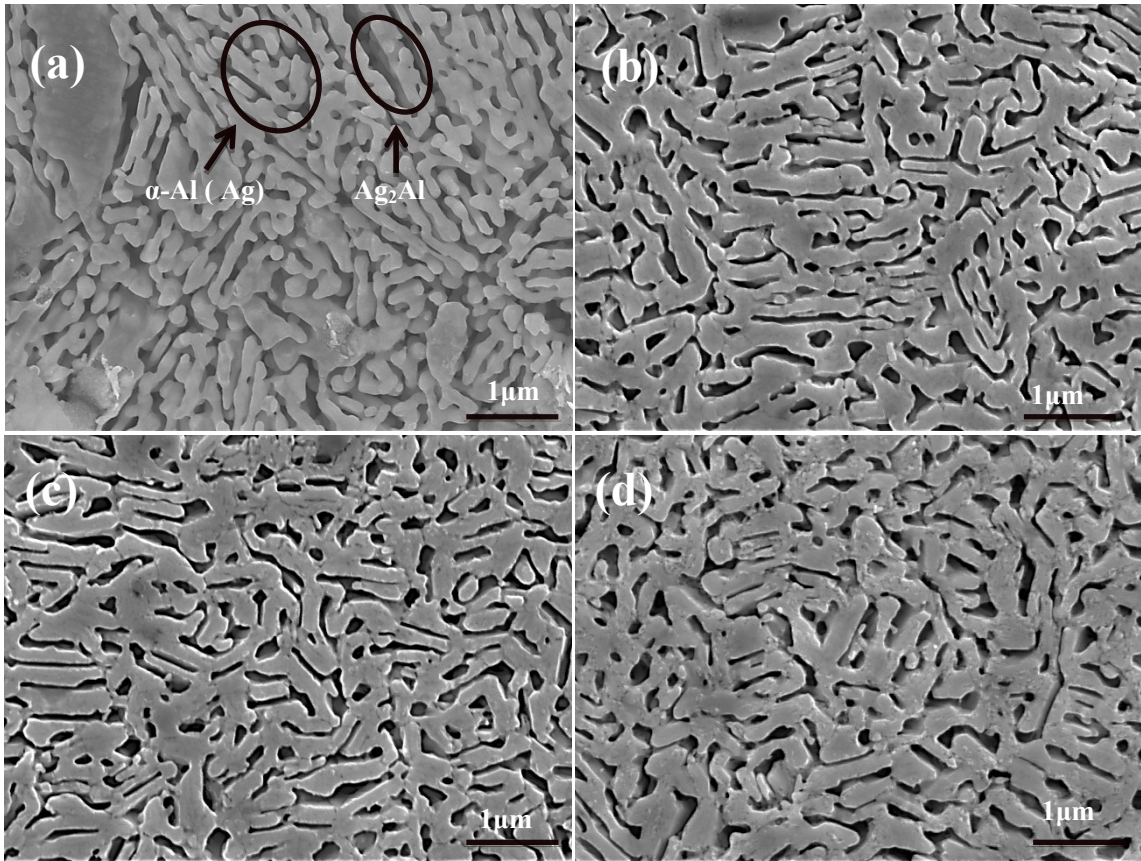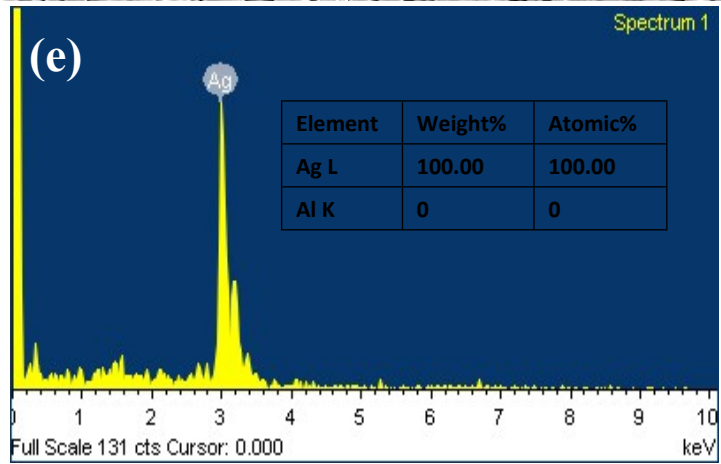

FIG. 7



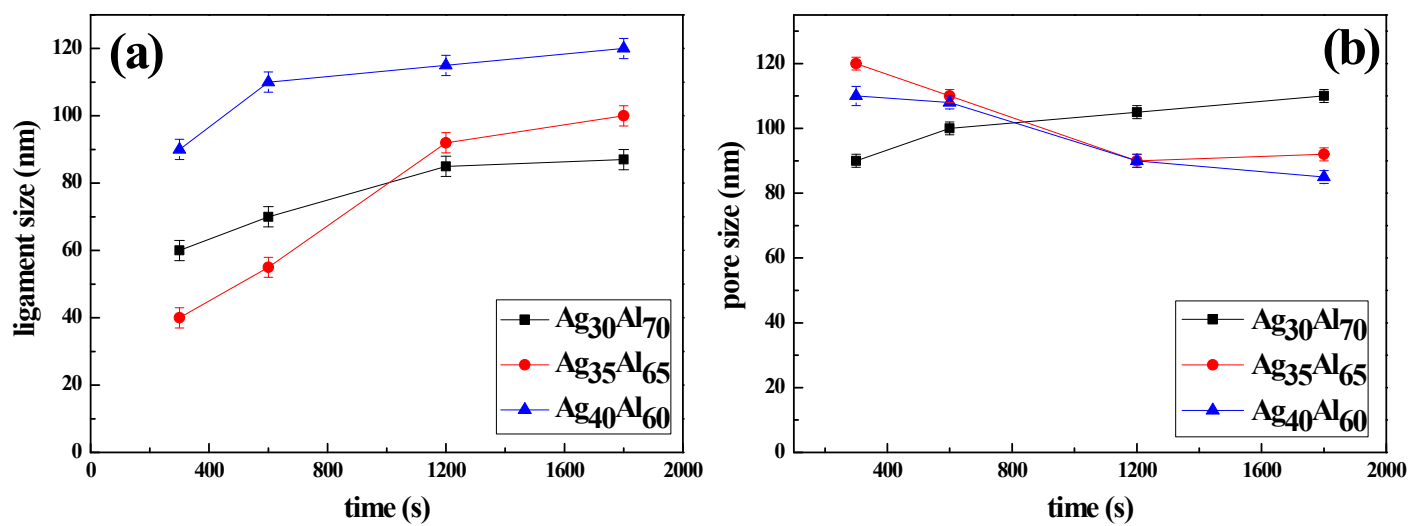

FIG. 8

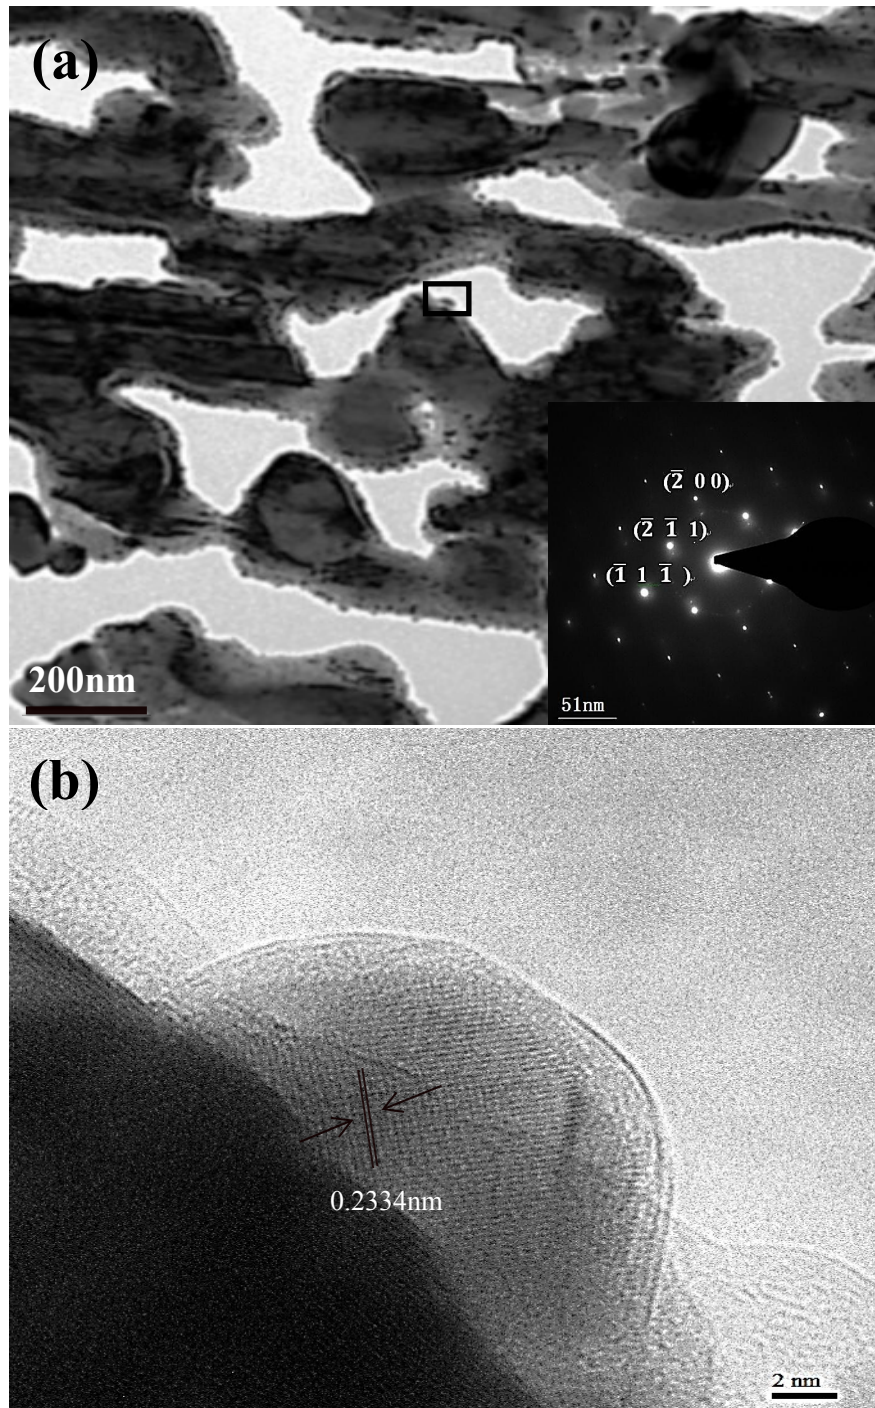

FIG. 9

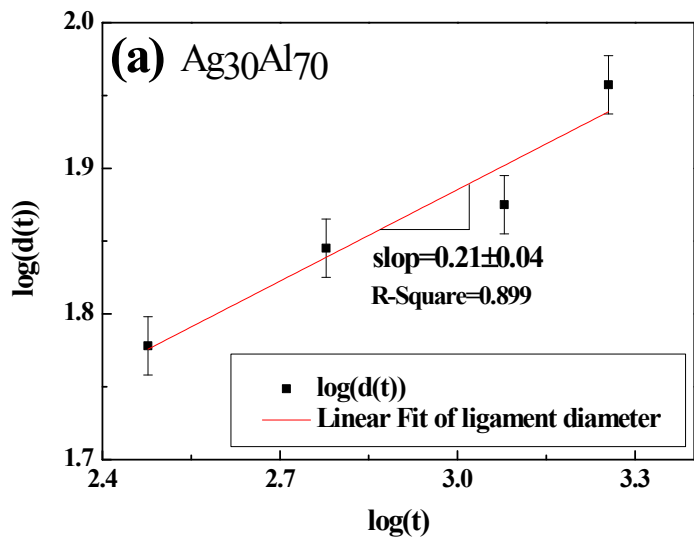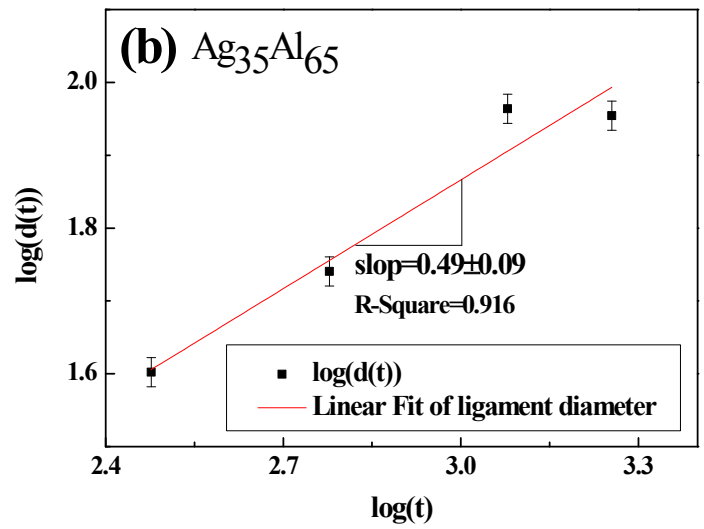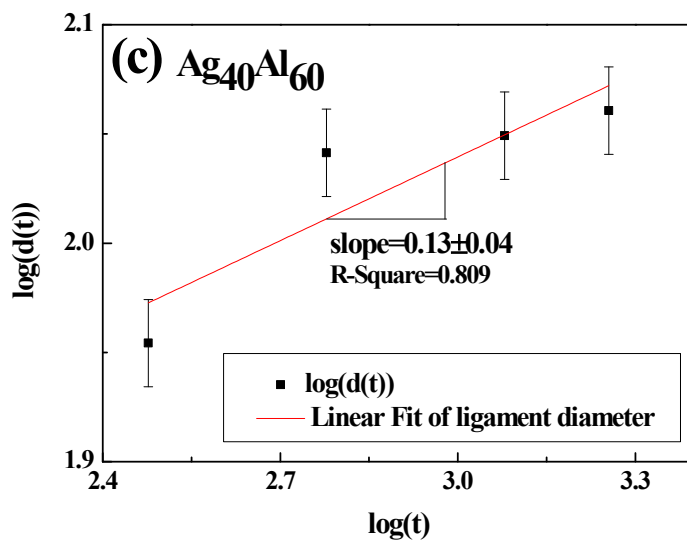

FIG. 10

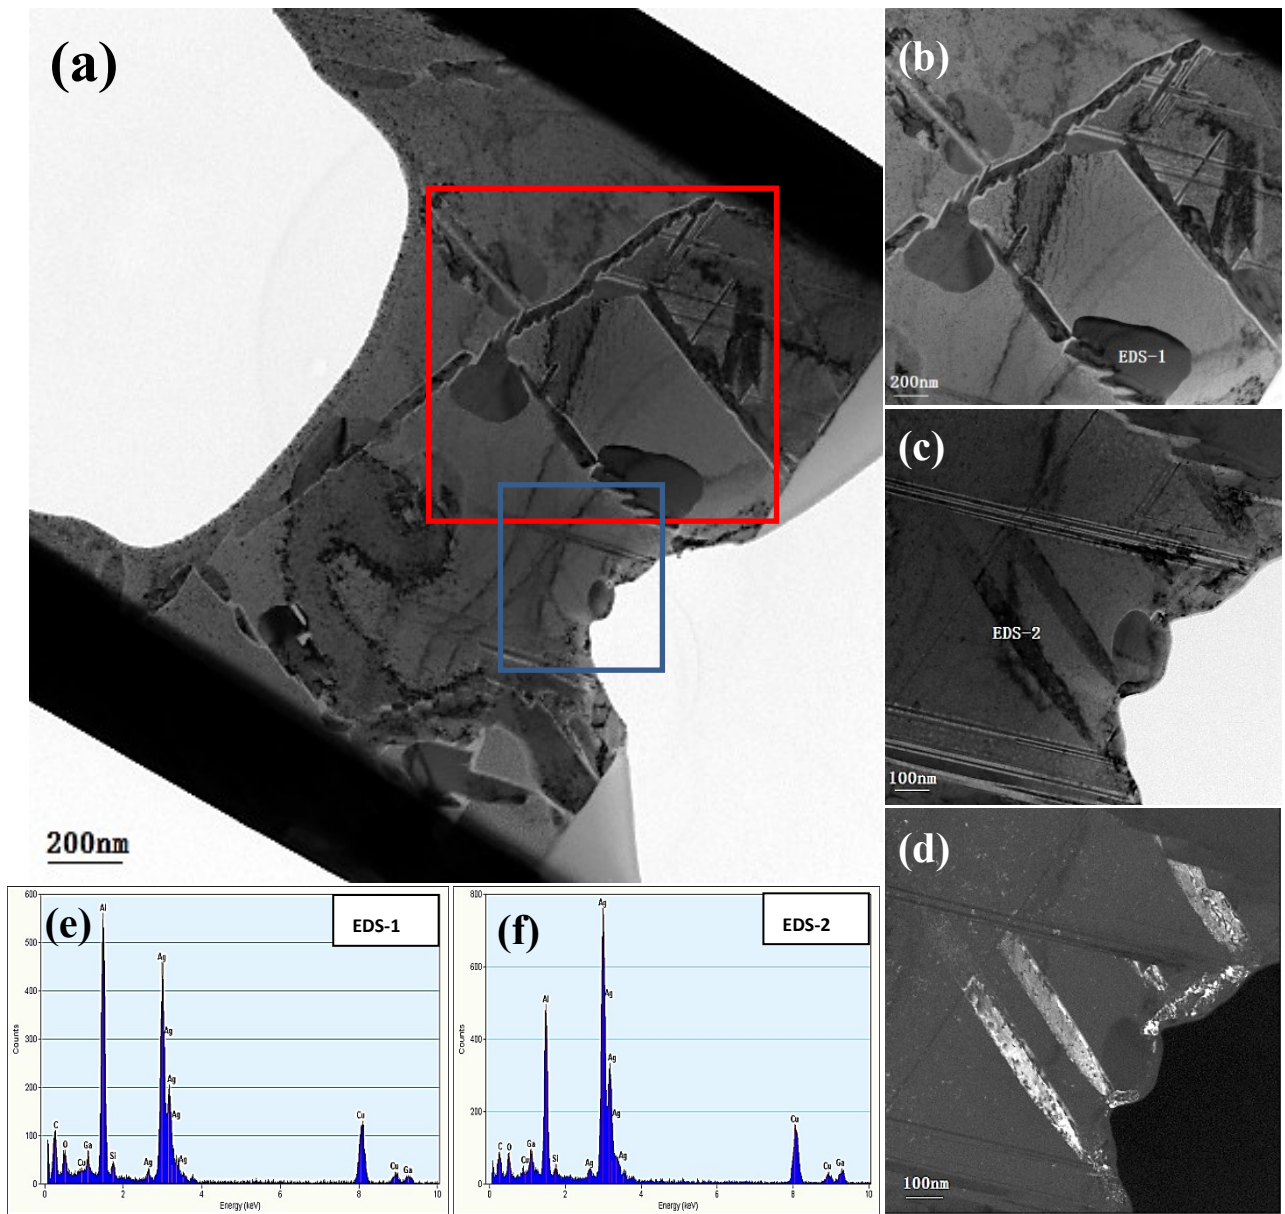

FIG. 11
